# Supplementary material
Source: publisher figshare collection journal article supplement (https://frontiersin.figshare.com/ndownloader/files/11653532)
Supplement: Supplementary file 1 [file 11653532]

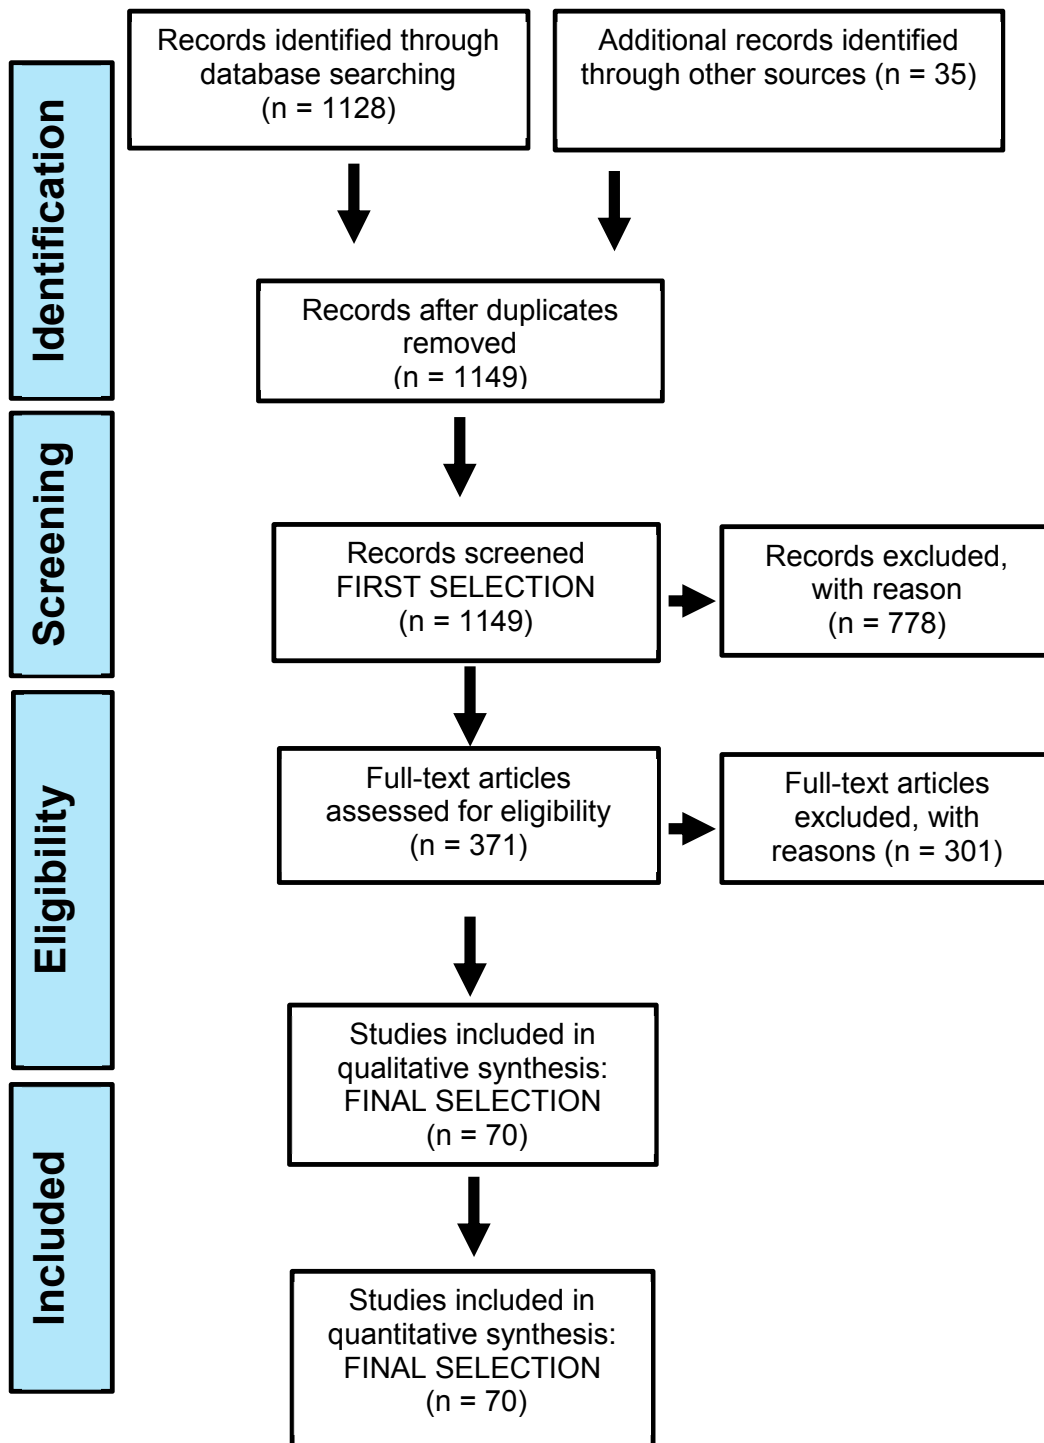

Figure S1. PRISMA (Preferred Reporting Items for Systematic Reviews and Meta-Analyses) statement.
